# Supplementary material for: Dipeptidyl Peptidase 4 Is a Novel Adipokine Potentially Linking Obesity to the Metabolic Syndrome
Source: PubMed Central journal article supplement — Diabetes. 2011 Jun 20;60(7):1917–25. doi: 10.2337/db10-1707 (PMC3121429; doi:10.2337/db10-1707), 2011-06-20
Supplement: supp_db10-1707_DB101707SupplementaryData.pdf [file supp_db10-1707_DB101707SupplementaryData.pdf]

SUPPLEMENTARY DATA

**Supplementary Table 1.** Characterization of patients involved in Clinical study 1 and 2

|                             | Study 1              |                           | Study 2                |                           |                                             |
|-----------------------------|----------------------|---------------------------|------------------------|---------------------------|---------------------------------------------|
|                             | Lean males<br>(n=20) | Obese males<br>(n=20)     | Lean females<br>(n=10) | Obese females<br>(n=19)   | Obese<br>females after<br>surgery<br>(n=16) |
| Age (years)                 | 56.2 ± 3.9           | 50.9 ± 3.2                | 43.2 ± 2.6             | 42.9 ± 1.9                | -                                           |
| BMI (kg/m <sup>2</sup> )    | 23.3 ± 1.5           | 44.5 ± 1.2 <sup>a</sup>   | 24.8 ± 1.5             | 41.4 ± 1.1 <sup>a</sup>   | 27.9 ± 0.8 <sup>b</sup>                     |
| Waist (cm)                  | 93.2 ± 4.1           | 144.0 ± 3.4 <sup>a</sup>  | 86.7 ± 3.4             | 127.0 ± 2.4 <sup>a</sup>  | 94.7 ± 2.7 <sup>b</sup>                     |
| % Body fat                  | 23.8 ± 1.5           | 40.7 ± 1.2 <sup>a</sup>   | 34.6 ± 2.1             | 60.1 ± 1.5 <sup>a</sup>   | 37.6 ± 2.0 <sup>b</sup>                     |
| Glucose (mmol/l)            | 4.61 ± 0.78          | 7.67 ± 0.67 <sup>a</sup>  | 5.00 ± 0.42            | 5.58 ± 0.30               | 4.79 ± 0.12 <sup>b</sup>                    |
| Insulin (μU/ml)             | 5.14 ± 3.21          | 30.47 ± 2.91 <sup>a</sup> | 4.48 ± 2.19            | 13.37 ± 1.58 <sup>a</sup> | 4.89 ± 0.56 <sup>b</sup>                    |
| HOMA                        | 1.05 ± 1.39          | 10.51 ± 1.21 <sup>a</sup> | 1.00 ± 0.87            | 3.53 ± 0.63 <sup>a</sup>  | 1.01 ± 0.14 <sup>b</sup>                    |
| HDL-Cholesterol<br>(mmol/l) | 1.42 ± 0.08          | 1.01 ± 0.07 <sup>a</sup>  | 1.65 ± 0.09            | 1.23 ± 0.07 <sup>a</sup>  | 1.59 ± 0.14 <sup>b</sup>                    |
| Triglycerides<br>(mmol/l)   | 1.42 ± 0.51          | 2.69 ± 0.42 <sup>a</sup>  | 0.79 ± 0.23            | 1.56 ± 0.17 <sup>a</sup>  | 1.01 ± 0.10 <sup>b</sup>                    |

Data are mean values ± SEM.

a – significantly different from lean

b – significantly different from obese before surgery
